# Supplementary material
Source: MDPI journal article supplement (https://www.mdpi.com/2073-4344/9/10/819)
Supplement: s1 [file s1]

## Supplementary Materials

# Enhanced Visible Light Photodegradation of Microplastic Fragments with Plasmonic Platinum/Zinc Oxide Nanorod Photocatalysts

# Enhanced Visible Light Photodegradation of Microplastic Fragments with Plasmonic Platinum/Zinc Oxide Nanorod Photocatalysts

Tajkia Syeed Tofa <sup>1,2</sup>, Fei Ye <sup>3</sup>, Karthik Laxman Kunjali <sup>3</sup> and Joydeep Dutta <sup>3,\*</sup>

<sup>1</sup> Department of Sustainable Development, Environmental Science and Engineering (SEED), School of Architecture and Built Environment, KTH Royal Institute of Technology, 100 44 Stockholm, Sweden

<sup>2</sup> Department of Civil and Environmental Engineering (CEE), Islamic University of Technology, Gazipur 1704, Dhaka, Bangladesh

<sup>3</sup> Functional Materials, Department of Applied Physics, School of Engineering Sciences, KTH Royal Institute of Technology, 164 40 Kista, Stockholm, Sweden

\* Correspondence: joydeep@kth.se; Tel.: +46-8-7908142

Received: 14 September 2019; Accepted: 26 September 2019; Published: date

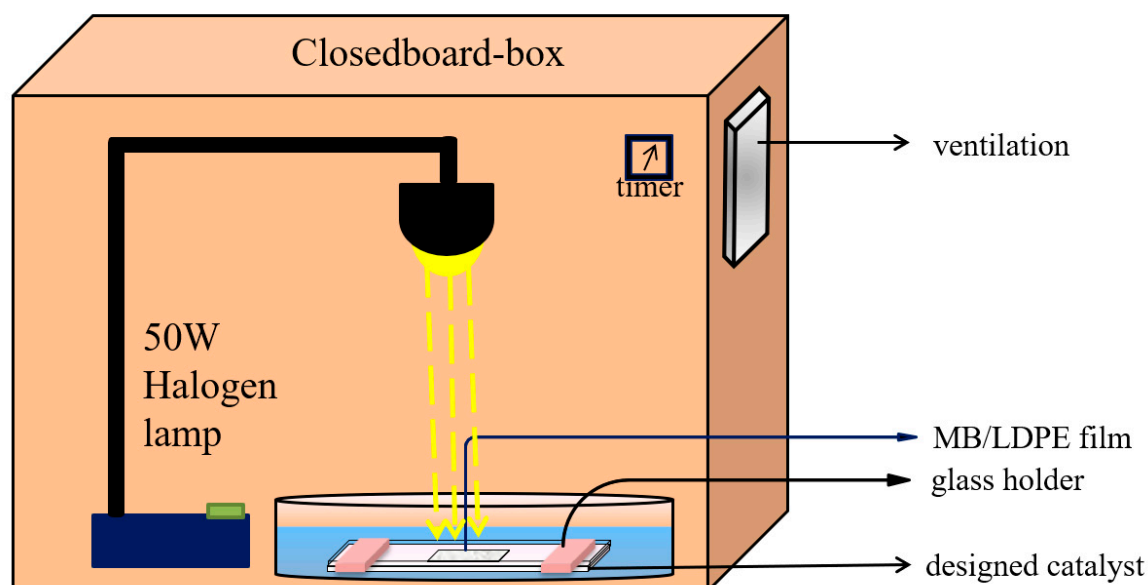

**Figure S1.** Experimental setup for photocatalytic degradation of LDPE film.

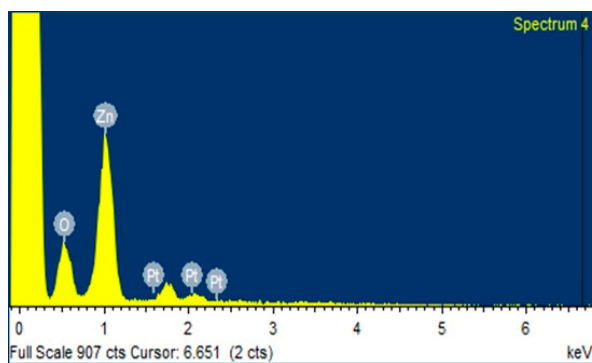

| Element      | Weight% | Atomic% |
|--------------|---------|---------|
| Oxygen, O    | 23.94   | 57.46   |
| Zinc, Zn     | 70.63   | 41.48   |
| Platinum, Pt | 5.43    | 1.07    |

**Figure S2.** X-ray dispersive spectroscopy (EDX) result showing relative elemental composition of ZnO-Pt catalyst.
